# Supplementary material for: West Nile Virus, Texas, USA, 2012
Source: PubMed Central journal article supplement (PMC3837649; doi:10.3201/eid1911.130768), 2013-11
Supplement: 13-0768-Techapp-s1.pdf [file 13-0768-Techapp-s1.pdf]

# West Nile Virus, Texas, USA, 2012

## Technical Appendix

Technical Appendix Table. Calculations for economic costs used for calculation of West Nile virus, Texas, USA, 2012\*

| Cost  | Barber et al. cost estimate (1)<br>(range) | Cost estimate adjusted to 2012<br>USD† (range) | No.<br>cases | Estimated 2012 cost                       |
|-------|--------------------------------------------|------------------------------------------------|--------------|-------------------------------------------|
| WNND  | \$46,531 (\$13,201–\$140,257)              | \$54,702 (\$15,519–\$164,886)                  | 844          | \$46,168,488 (\$13,098,036–\$139,163,784) |
| WNF   | \$1,170 (\$1128–\$1235)                    | \$1,375 (\$1326–\$1452)                        | 1,024        | \$1,408,000 (\$1,357,824–\$1,486,848)     |
| Total |                                            |                                                |              | \$47,576,488 (\$14,455,860–\$140,650,632) |

\*WNND, West Nile neuroinvasive disease; WNF, West Nile fever.

†Adjustment to 2012 US dollars made by using the Bureau of Labor Statistics Consumer Price Index Calculator ([www.bls.gov/data/inflation\\_calculator.htm](http://www.bls.gov/data/inflation_calculator.htm)).

## Reference

1. Barber LM, Schleier JJ III, Peterson RK. Economic cost analysis of West Nile virus outbreak, Sacramento County, California, USA, 2005. *Emerg Infect Dis.* 2010;16:480–6. [PubMed](http://dx.doi.org/10.3201/eid1603.090667)  
<http://dx.doi.org/10.3201/eid1603.090667>
